# Supplementary material for: Development of S-Methylmethionine Sulfonium Derivatives and Their Skin-Protective Effect against Ultraviolet Exposure
Source: PubMed Central journal article supplement — Biomol Ther (Seoul). 2017 Nov 13;26(3):306–12. doi: 10.4062/biomolther.2017.109 (PMC5933898; doi:10.4062/biomolther.2017.109), 2017-11-13
Supplement: bt-26-306_suppl.pdf [file bt-26-306_suppl.pdf]

## Supplementary Figures and legends

Compound 5

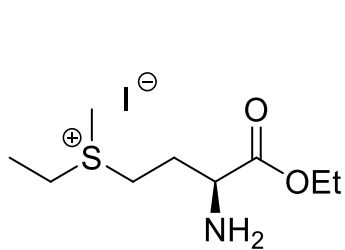

Compound 9

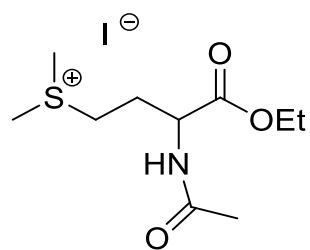

Compound 15

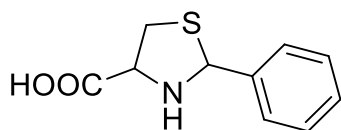

Compound 16

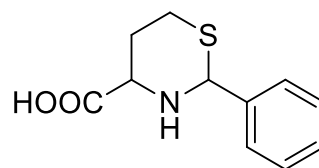

Compound 17

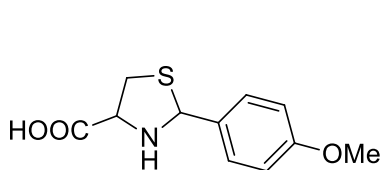

Compound 20

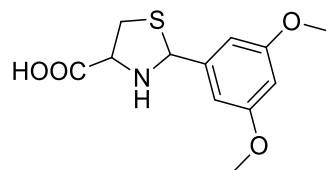

Compound 22

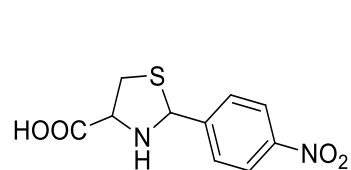

**Fig. S1.** Chemical structure of SMMS derivatives

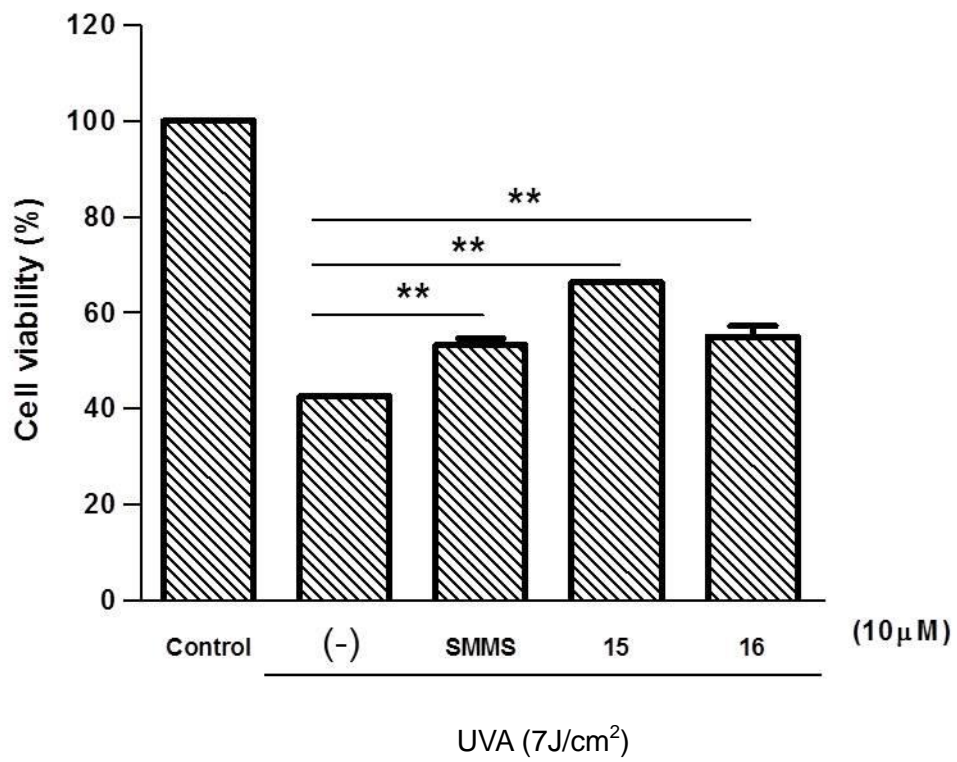

**Fig. S2.** Protection of SMMS and its derivatives from UVA irradiation (7J/cm<sup>2</sup>) in hDFs.
